# Supplementary material for: Health economic evaluation of moist wound care in chronic cutaneous leishmaniasis ulcers in Afghanistan
Source: PubMed Central journal article supplement (PMC5812215; doi:10.1186/s40249-018-0389-4), 2018-02-14

**Additional file 2:** Decision analytical model. Three treatment alternatives in patients with open chronic cutaneous Leishmaniasis wounds.

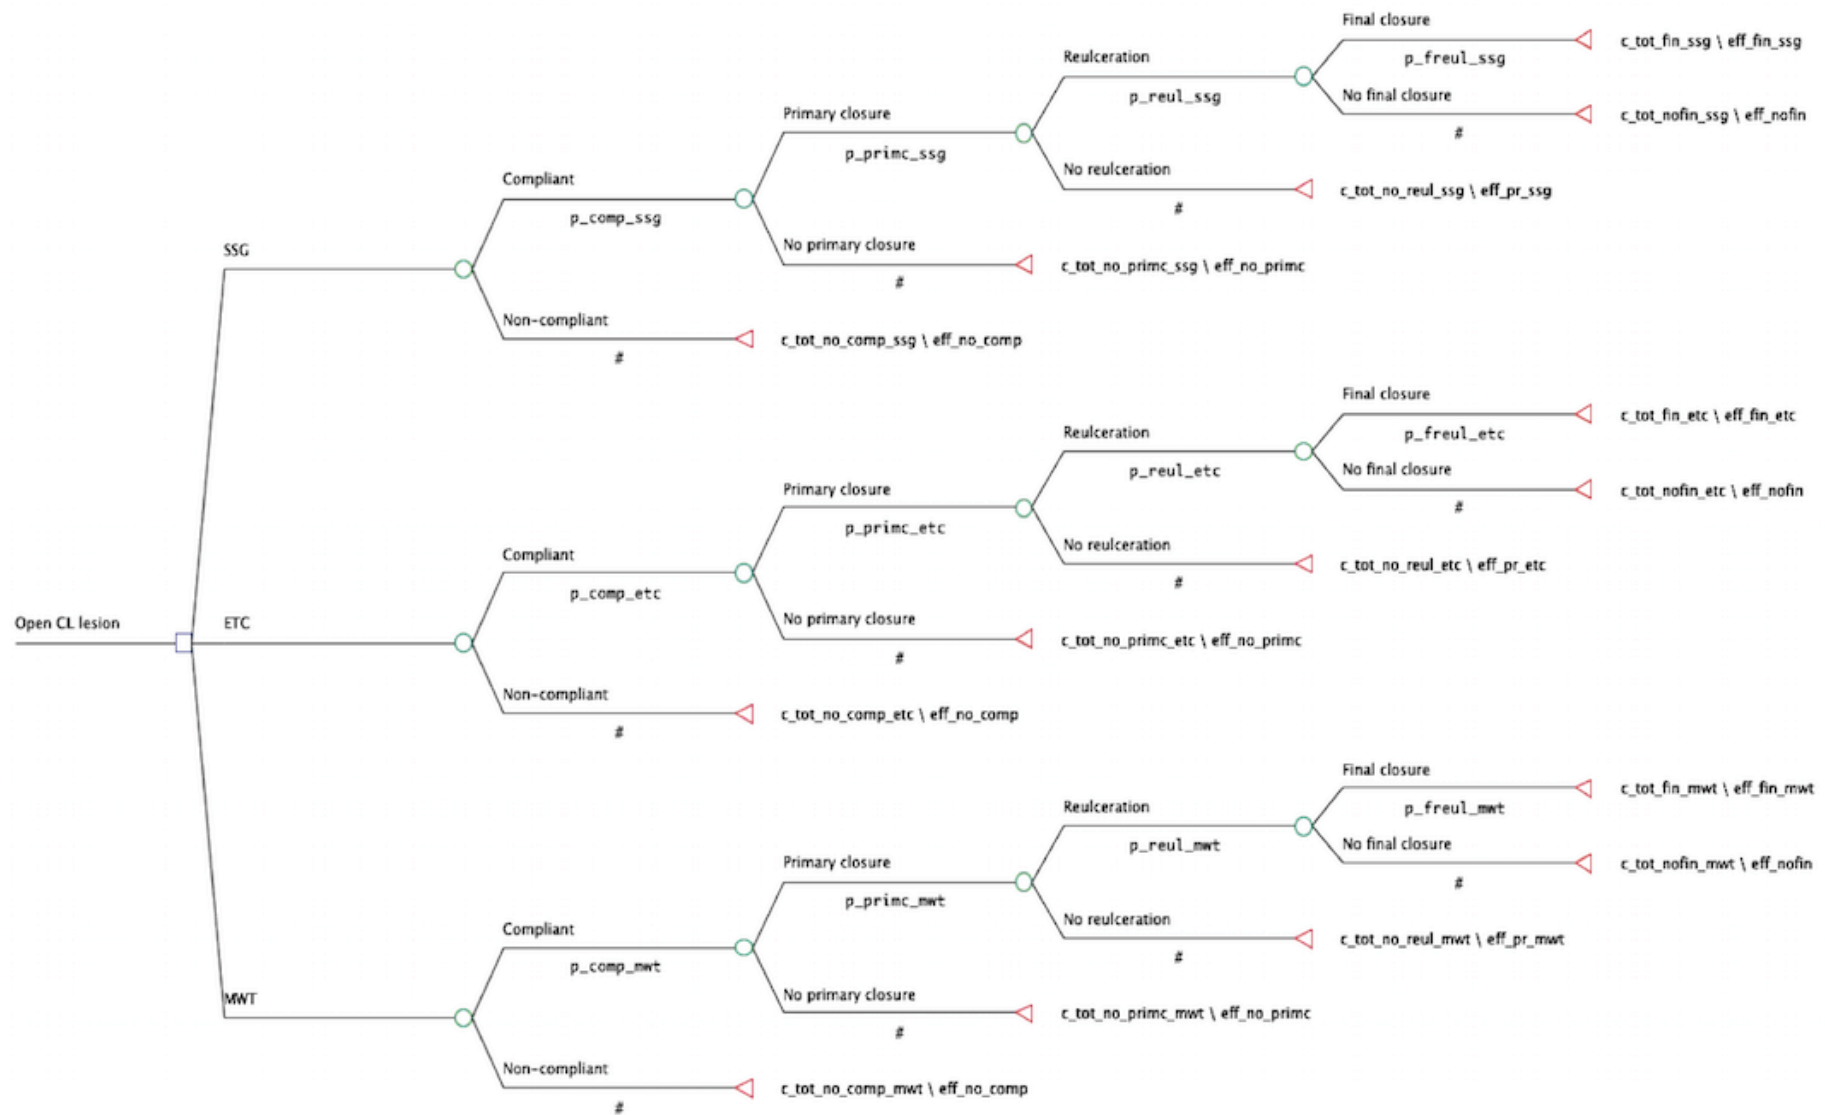

Supplement: 40249_2018_389_MOESM2_ESM.pdf [file 40249_2018_389_MOESM2_ESM.pdf]
