# Supplementary material for: Health economic evaluation of moist wound care in chronic cutaneous leishmaniasis ulcers in Afghanistan
Source: PubMed Central journal article supplement (PMC5812215; doi:10.1186/s40249-018-0389-4), 2018-02-14
Supplement: 40249_2018_389_MOESM3_ESM.pdf [file 40249_2018_389_MOESM3_ESM.pdf]

**Table S1: Calibration of the decision tree with model assumptions and decision nodes probabilities.** Baseline values, sensitivity ranges and distributions. \*Triangular (min, max, modus), \*Beta (alpha, beta)

| Parameter                        | Baseline value | Sensitivity |        | Distribution                | Source                   |
|----------------------------------|----------------|-------------|--------|-----------------------------|--------------------------|
|                                  |                | From        | To     |                             |                          |
| <b>Assumptions</b>               |                |             |        |                             |                          |
| Number of lesion                 | 1              | 1           | 4      | None                        | Model                    |
| Duration of disease              | 303            | 180         | 365    | Triangular (180, 365, 365)* | Murray et al. (2005)     |
| Non-compliant cost rate          | 0.25           | 0           | 0.5    | Triangular (0, 0.5, 0.25)   | Educated guess           |
| Per capita income                | 700            | 700         | 1000   | None                        | World bank               |
| <b>Node probabilities SSG</b>    |                |             |        |                             |                          |
| Treatment compliance             | 0.614          | 0.5526      | 0.6754 | Beta (148, 93)*             | Reithinger et al. (2015) |
| Primary closure                  | 0.957          | 0.8613      | 1      | Beta (22, 1)                | Stahl et al. (2014)      |
| Reulceration                     | 0.182          | 0.1638      | 0.2000 | Beta (4, 18)                | Stahl et al. (2014)      |
| Final closure after reulceration | 0.75           | 0.6750      | 0.8250 | Beta (3, 1)                 | Stahl et al. (2014)      |
| <b>Node probabilities ETC</b>    |                |             |        |                             |                          |
| Treatment compliance             | 0.719          | 0.6471      | 0.7909 | Beta (23, 9)                | Stahl et al. (2014)      |
| Primary closure                  | 1              | 0.9000      | 1      | Beta (22.75, 0.25)          | Stahl et al. (2014)      |
| Reulceration                     | 0.13           | 0.1170      | 0.1430 | Beta (3, 20)                | Stahl et al. (2014)      |
| Final closure after reulceration | 0.667          | 0.6003      | 0.7337 | Beta (2, 1)                 | Stahl et al. (2014)      |
| <b>Node probabilities MWT</b>    |                |             |        |                             |                          |
| Treatment compliance             | 0.742          | 0.6678      | 0.8162 | Beta (23, 8)                | Stahl et al. (2014)      |
| Primary closure                  | 1              | 0.9000      | 1      | Beta (22.75, 0.25)          | Stahl et al. (2014)      |
| Reulceration                     | 0.304          | 0.2736      | 0.3344 | Beta (7, 16)                | Stahl et al. (2014)      |
| Final closure after reulceration | 0.286          | 0.2574      | 0.3146 | Beta (2, 5)                 | Stahl et al. (2014)      |

**Table S2: Efficacy parameters.** Baseline values, sensitivity ranges and distributions. \*Triangular (min, max, modus)

| Parameter                                          | Baseline value | Sensitivity |     | Distribution               | Source              |
|----------------------------------------------------|----------------|-------------|-----|----------------------------|---------------------|
|                                                    |                | From        | To  |                            |                     |
| <b>Efficacy SSG</b>                                |                |             |     |                            |                     |
| Mean days for primary closure                      | 69             | 49          | 89  | Triangular (49, 89, 69)*   | Stahl et al. (2014) |
| Mean days of reulceration                          | 15             | 7           | 27  | Triangular (7, 27, 11)     | Stahl et al. (2014) |
| Mean days between primary closure and reulceration | 27             | 11          | 44  | Triangular (11, 44, 26)    | Stahl et al. (2014) |
| Mean days for final closure                        | 96             | 57          | 136 | Triangular (57, 136, 95)   | Stahl et al. (2014) |
| <b>Efficacy ETC</b>                                |                |             |     |                            |                     |
| Mean days for primary closure                      | 33             | 29          | 37  | Triangular (29, 37, 33)    | Stahl et al. (2014) |
| Mean days of reulceration                          | 32             | 16          | 48  | Triangular (16, 48, 32)    | Stahl et al. (2014) |
| Mean days between primary closure and reulceration | 53             | 25          | 107 | Triangular (25, 107, 27)   | Stahl et al. (2014) |
| Mean days for final closure                        | 136            | 116         | 156 | Triangular (116, 156, 136) | Stahl et al. (2014) |
| <b>Efficacy MWT</b>                                |                |             |     |                            |                     |
| Mean days for primary closure                      | 45             | 34          | 56  | Triangular (34, 56, 45)    | Stahl et al. (2014) |
| Mean days of reulceration                          | 41             | 14          | 67  | Triangular (14, 67, 41)    | Stahl et al. (2014) |
| Mean days between primary closure and reulceration | 39             | 12          | 66  | Triangular (12, 66, 39)    | Stahl et al. (2014) |
| Mean days for final closure                        | 71             | 42          | 99  | Triangular (42, 99, 71)    | Stahl et al. (2014) |

**Table S3: Direct medical costs.** Baseline values, sensitivity ranges and distributions. \*Gamma (alpha, beta)

| Parameter                               | Baseline value | Sensitivity |        | Distribution       | Source              |
|-----------------------------------------|----------------|-------------|--------|--------------------|---------------------|
|                                         |                | From        | To     |                    |                     |
| <b>Direct medical cost SSG</b>          |                |             |        |                    |                     |
| <b>Drug SSG</b>                         |                |             |        |                    |                     |
| Cost per ml SSG                         | 0.22           | 0.194       | 1      | Gamma (100, 454)*  | Albert David, India |
| Dosage of SSG per wound (ml)            | 0.60           | 0.540       | 0.660  | Normal (0.6, 0.06) | Stahl et al. (2014) |
| <b>Desinfection</b>                     |                |             |        |                    |                     |
| Cost per ml ethanol                     | 0.004          | 0.0036      | 0.0044 | Gamma (100, 25000) | Pharmacy MeS        |
| Ethanol dosage per wound (ml)           | 2              | 1           | 3      | Normal (2, 1)      | Stahl et al. (2014) |
| <b>Disposables</b>                      |                |             |        |                    |                     |
| Cost syringe (1cc) per unit             | 0.06           | 0.054       | 0.066  | Gamma (100, 1666)  | Pharmacy MeS        |
| Cost gloves per pair                    | 0.07           | 0.063       | 0.077  | Gamma (100, 1428)  | Pharmacy MeS        |
| Cost gauze per unit                     | 0.02           | 0.018       | 0.022  | Gamma (100, 5000)  | Pharmacy MeS        |
| <b>Number of injection</b>              |                |             |        |                    |                     |
| Number of injection for primary closure | 12             | 10          | 14     | None               | Stahl et al. (2014) |
| Average days between two injections     | 3              | 2           | 4      | Normal (3, 1)      | Stahl et al. (2014) |

**Table S3 (continued): Direct medical costs.** Baseline values, sensitivity ranges and distributions. \*Gamma (alpha, beta)

| Parameter                                              | Baseline value | Sensitivity |       | Distribution                 | Source              |
|--------------------------------------------------------|----------------|-------------|-------|------------------------------|---------------------|
|                                                        |                | From        | To    |                              |                     |
| <b>Direct medical cost ETC</b>                         |                |             |       |                              |                     |
| <b>Fix costs: ETC</b>                                  |                |             |       |                              |                     |
| <b>ETC Medical device</b>                              |                |             |       |                              |                     |
| Unit price ETC Minicutter                              | 2040.97        | 1.836.873   | 4.080 | Gamma (100, 0.048)           | KLS Martin          |
| Lifetime ETC device                                    | 10             | 5           | 20    | Triangular (5, 20, 5)        | KLS Martin          |
| Wounds per year treated with ETC                       | 2000           | 500         | 4000  | Triangular (500, 4000, 1500) | Model               |
| <b>Anesthesia of the lesion</b>                        |                |             |       |                              |                     |
| Lidocain 1% injection solution per ml                  | 0.03           | 0.027       | 0.033 | Gamma (100, 3333)            | Pharmacy in MeS     |
| Dosage lidocain (ml) per wound                         | 2              | 1           | 3     | Normal (2,1)                 | Stahl et al. (2014) |
| <b>Syringe for basic creme</b>                         |                |             |       |                              |                     |
| Syringe for basic creme (20cc)                         | 0.04           | 0.036       | 0.044 | Gamma (100, 2500)            | Pharmacy in MeS     |
| <b>Variable costs: Dressing costs</b>                  |                |             |       |                              |                     |
| <b>Jelly or Basic creme DAC N-055</b>                  |                |             |       |                              |                     |
| Cost per g of DAC N-055 Basic creme or jelly           | 0.085          | 0.085       | 1     | Gamma (100, 1176)            | Waisenmedizin e.V.  |
| Dosage of DAC N-055 Basic creme or jelly per wound (g) | 2              | 1           | 3     | Normal (2,1)                 | Stahl et al. (2014) |
| <b>Desinfection</b>                                    |                |             |       |                              |                     |
| Cost per ml ethanol                                    | 0.04           | 0.036       | 0.044 | Gamma (100, 25000)           | Pharmacy in MeS     |
| Dosage per wound ethanol (ml)                          | 2              | 1           | 3     | Normal (2, 1)                | Stahl et al. (2014) |
| <b>Disposables</b>                                     |                |             |       |                              |                     |
| Cost gauze per unit                                    | 0.02           | 0.018       | 0.022 | Gamma (100, 5000)            | Pharmacy in MeS     |
| Cost gloves per pair                                   | 0.07           | 0.063       | 0.077 | Gamma (100, 1428)            | Pharmacy in MeS     |
| Cost Leukoplast (30cm)                                 | 0.01           | 0.009       | 0.011 | Gamma (100, 10000)           | Pharmacy in MeS     |
| <b>Number of dressings</b>                             |                |             |       |                              |                     |
| Average days between two dressings                     | 3              | 2           | 4     | Normal (3, 1)                | Stahl et al. (2014) |

**Table S3 (continued): Direct medical costs.** Baseline values, sensitivity ranges and distributions. \*Gamma (alpha, beta)

| Parameter                                              | Baseline value | Sensitivity |        | Distribution       | Source              |
|--------------------------------------------------------|----------------|-------------|--------|--------------------|---------------------|
|                                                        |                | From        | To     |                    |                     |
| <b>Direct medical cost MWT</b>                         |                |             |        |                    |                     |
| <b>Fix costs: MWT</b>                                  |                |             |        |                    |                     |
| <b>Syringe for basic creme</b>                         |                |             |        |                    |                     |
| Syringe for basic creme (20cc)                         | 0.04           | 0.036       | 0.044  | Gamma (100, 2500)  | Pharmacy in MeS     |
| <b>Variable costs: Dressing costs</b>                  |                |             |        |                    |                     |
| <b>Jelly or Basic creme DAC N-055</b>                  |                |             |        |                    |                     |
| Cost per g of DAC N-055 Basic creme or jelly           | 0.085          | 0.085       | 1      | Gamma (100, 1176)  | Waisenmedizin e.V.  |
| Dosage of DAC N-055 Basic creme or jelly per wound (g) | 2              | 1           | 3      | Normal (2, 1)      | Stahl et al. (2014) |
| <b>Desinfection</b>                                    |                |             |        |                    |                     |
| Cost per ml ethanol                                    | 0.004          | 0.0036      | 0.0044 | Gamma (100, 25000) | Pharmacy in MeS     |
| Dosage per wound ethanol (ml)                          | 2              | 1           | 3      | Normal (2, 1)      | Stahl et al. (2014) |
| <b>Disposables</b>                                     |                |             |        |                    |                     |
| Cost gauze per unit                                    | 0.02           | 0.018       | 0.022  | Gamma (100, 5000)  | Pharmacy in MeS     |
| Cost gloves per pair                                   | 0.07           | 0.063       | 0.077  | Gamma (100, 1428)  | Pharmacy in MeS     |
| Cost Leukoplast (30cm)                                 | 0.01           | 0.009       | 0.011  | Gamma (100, 10000) | Pharmacy in MeS     |
| <b>Number of dressings</b>                             |                |             |        |                    |                     |
| Average days between two dressings                     | 3              | 2           | 4      | Normal (3, 1)      | Stahl et al. (2014) |

**Table S4: Direct non-medical costs.** Baseline values, sensitivity ranges and distributions. \*Gamma (apha, beta), \*Normal (mean, sd)

| Parameter                                                 | Baseline value | Sensitivity |      | Distribution   | Source              |
|-----------------------------------------------------------|----------------|-------------|------|----------------|---------------------|
|                                                           |                | From        | To   |                |                     |
| <b>Direct non-medical cost SSG</b>                        |                |             |      |                |                     |
| <b>Number of visits</b>                                   |                |             |      |                |                     |
| Mean number of follow-up visits                           | 5              | 4           | 6    | Normal (5, 1)  | Stahl et al. (2014) |
| <b>Transportation Cost</b>                                |                |             |      |                |                     |
| Mean transportation time per visit (in minutes)           | 21             | 18          | 24   | Normal (21, 7) | Stahl et al. (2014) |
| Mean transportation cost per visit                        | 0.4            | 0.31        | 0.49 | Gamma (49, 19) | Stahl et al. (2014) |
| Mean waiting time per visit before treatment (in minutes) | 7              | 6           | 8    | Normal (7, 2)  | Stahl et al. (2014) |
| Mean treatment time per visit (in minutes)                | 12             | 11          | 13   | Normal (12, 3) | Stahl et al. (2014) |
| <b>Direct non-medical cost ETC</b>                        |                |             |      |                |                     |
| <b>Number of visits</b>                                   |                |             |      |                |                     |
| Mean number of follow-up visits                           | 4              | 3           | 5    | Normal (4, 1)  | Stahl et al. (2014) |
| <b>Transportation Cost</b>                                |                |             |      |                |                     |
| Mean transportation time per visit (in minutes)           | 20             | 17          | 23   | Normal (21, 7) | Stahl et al. (2014) |
| Mean transportation cost per visit                        | 0.63           | 0.43        | 0.83 | Gamma (15, 10) | Stahl et al. (2014) |
| Mean waiting time per visit before treatment (in minutes) | 7              | 6           | 8    | Normal (7, 3)  | Stahl et al. (2014) |
| Mean treatment time per visit (in minutes)                | 13             | 12          | 14   | Normal (13, 3) | Stahl et al. (2014) |

**Table S4 (continued): Direct non-medical costs.** Baseline values, sensitivity ranges and distributions. \*Gamma (alpha, beta), \*Normal (mean, sd)

| Parameter                                                 | Baseline value | Sensitivity |      | Distribution   | Source              |
|-----------------------------------------------------------|----------------|-------------|------|----------------|---------------------|
|                                                           |                | From        | To   |                |                     |
| <b>Direct non-medical cost MWT</b>                        |                |             |      |                |                     |
| <b>Number of visits</b>                                   |                |             |      |                |                     |
| Mean number of follow-up visits                           | 4              | 3           | 6    | Normal (4, 1)  | Stahl et al. (2014) |
| <b>Transportation Cost</b>                                |                |             |      |                |                     |
| Mean transportation time per visit (in minutes)           | 21             | 18          | 24   | Normal (21, 7) | Stahl et al. (2014) |
| Mean transportation cost per visit                        | 0.54           | 0.33        | 0.75 | Gamma (7, 12)  | Stahl et al. (2014) |
| Mean waiting time per visit before treatment (in minutes) | 7              | 6           | 8    | Normal (7, 2)  | Stahl et al. (2014) |
| Mean treatment time per visit (in minutes)                | 13             | 12          | 14   | Normal (13, 3) | Stahl et al. (2014) |

**Table S5: Indirect costs.** Baseline values and sensitivity ranges.

| <b>Parameter</b>         | <b>Baseline value</b> | <b>Sensitivity</b> |           | <b>Distribution</b> | <b>Source</b>  |
|--------------------------|-----------------------|--------------------|-----------|---------------------|----------------|
|                          |                       | <b>From</b>        | <b>To</b> |                     |                |
| <b>Indirect cost SSG</b> |                       |                    |           |                     |                |
| <b>Productivity loss</b> |                       |                    |           |                     |                |
| Productivity loss        | 0.01                  | 0.01               | 0.2       | None                | Educated guess |
| <b>Indirect cost ETC</b> |                       |                    |           |                     |                |
| <b>Productivity loss</b> |                       |                    |           |                     |                |
| Productivity loss        | 0.01                  | 0.01               | 0.2       | None                | Educated guess |
| <b>Indirect cost MWT</b> |                       |                    |           |                     |                |
| <b>Productivity loss</b> |                       |                    |           |                     |                |
| Productivity loss        | 0.01                  | 0.01               | 0.2       | None                | Educated guess |
