# Supplementary material for: Health economic evaluation of moist wound care in chronic cutaneous leishmaniasis ulcers in Afghanistan
Source: PubMed Central journal article supplement (PMC5812215; doi:10.1186/s40249-018-0389-4), 2018-02-14

Figure S1

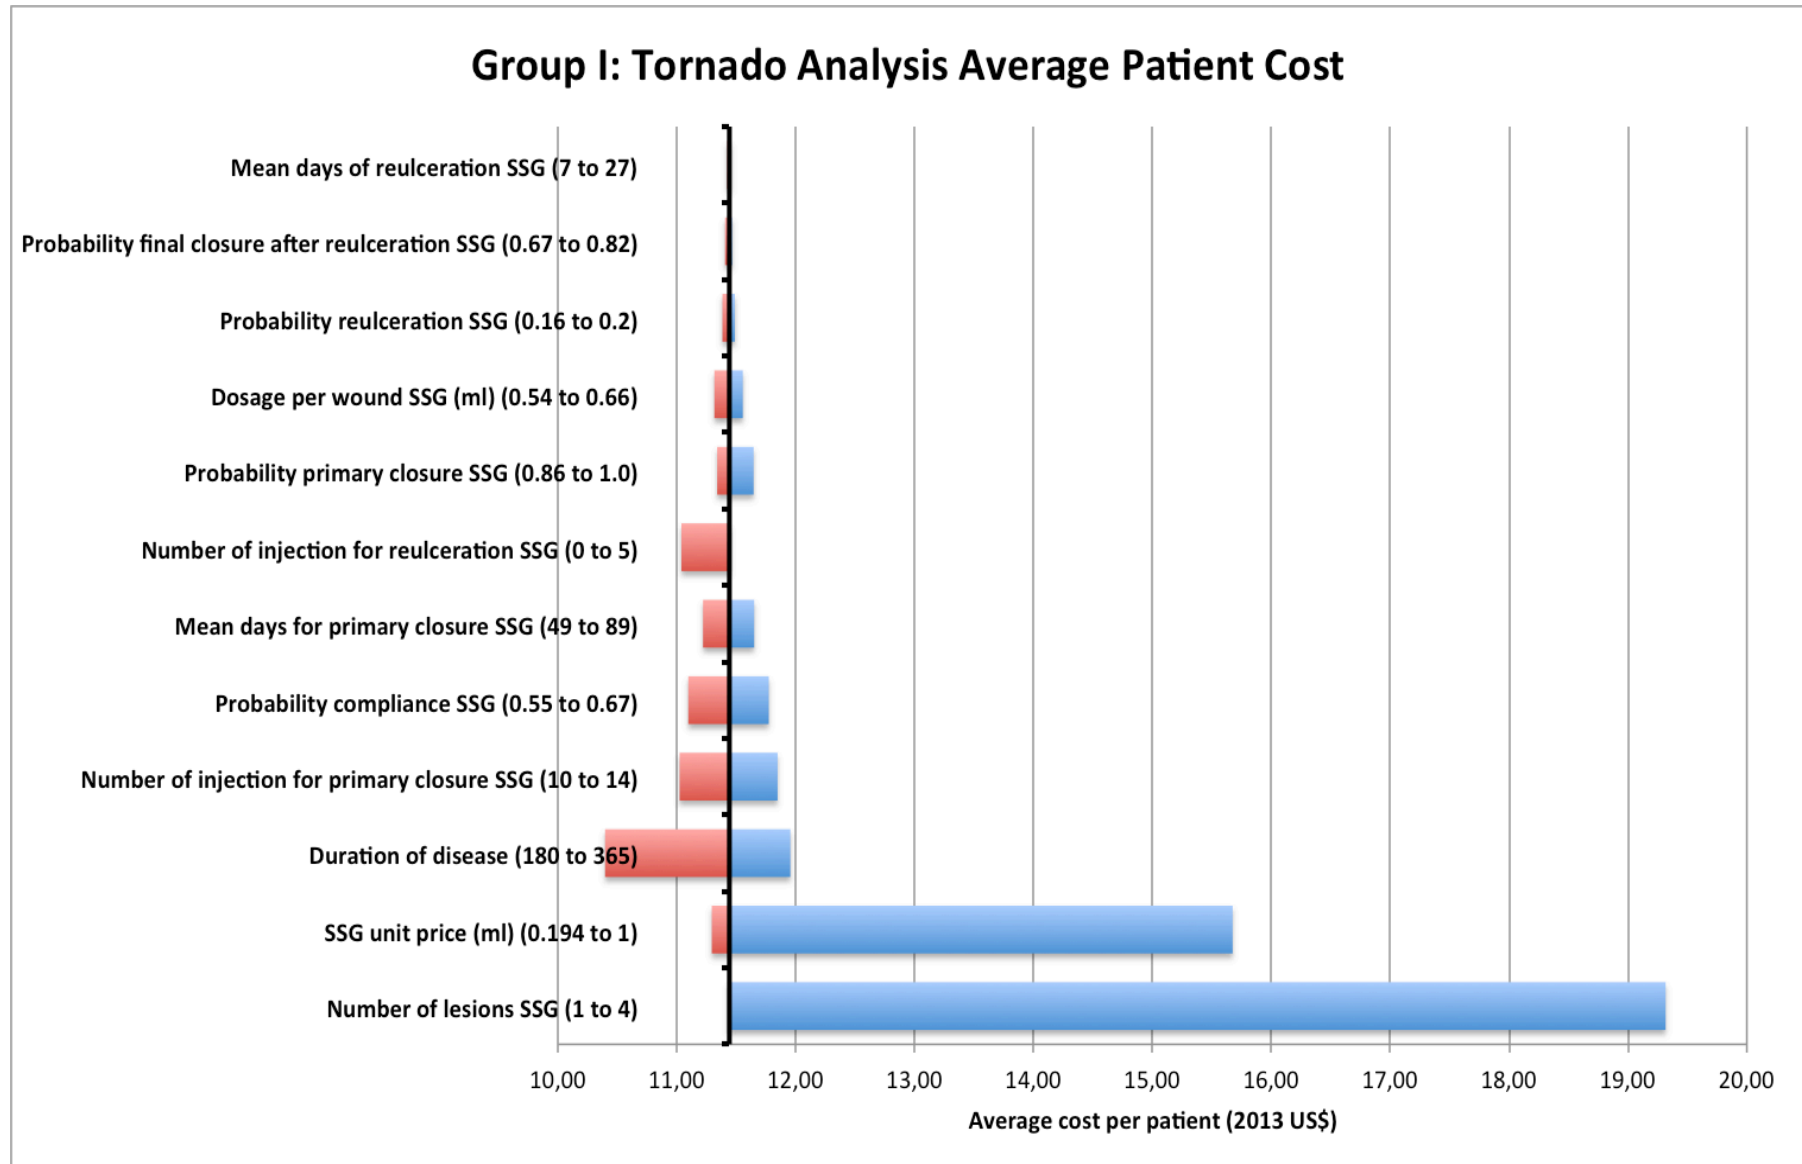

Figure S2

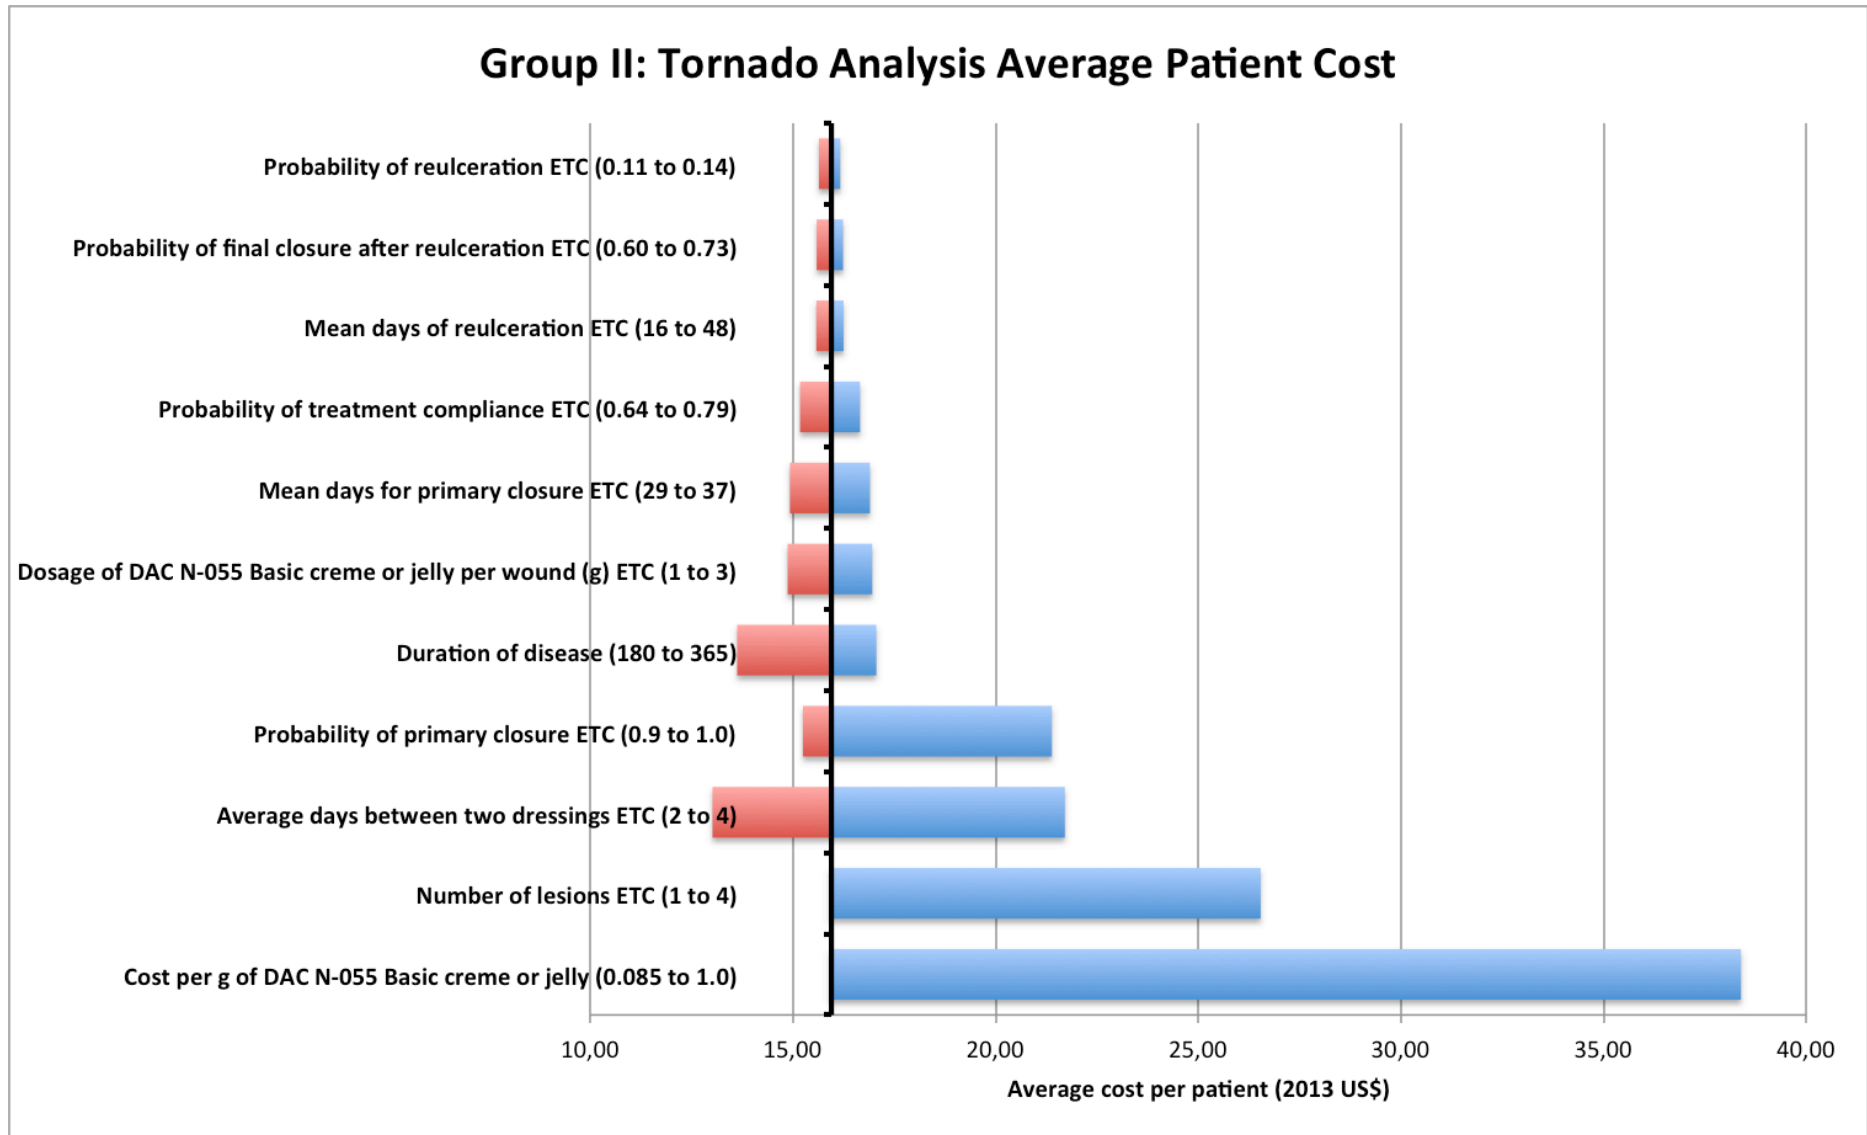

Figure S3

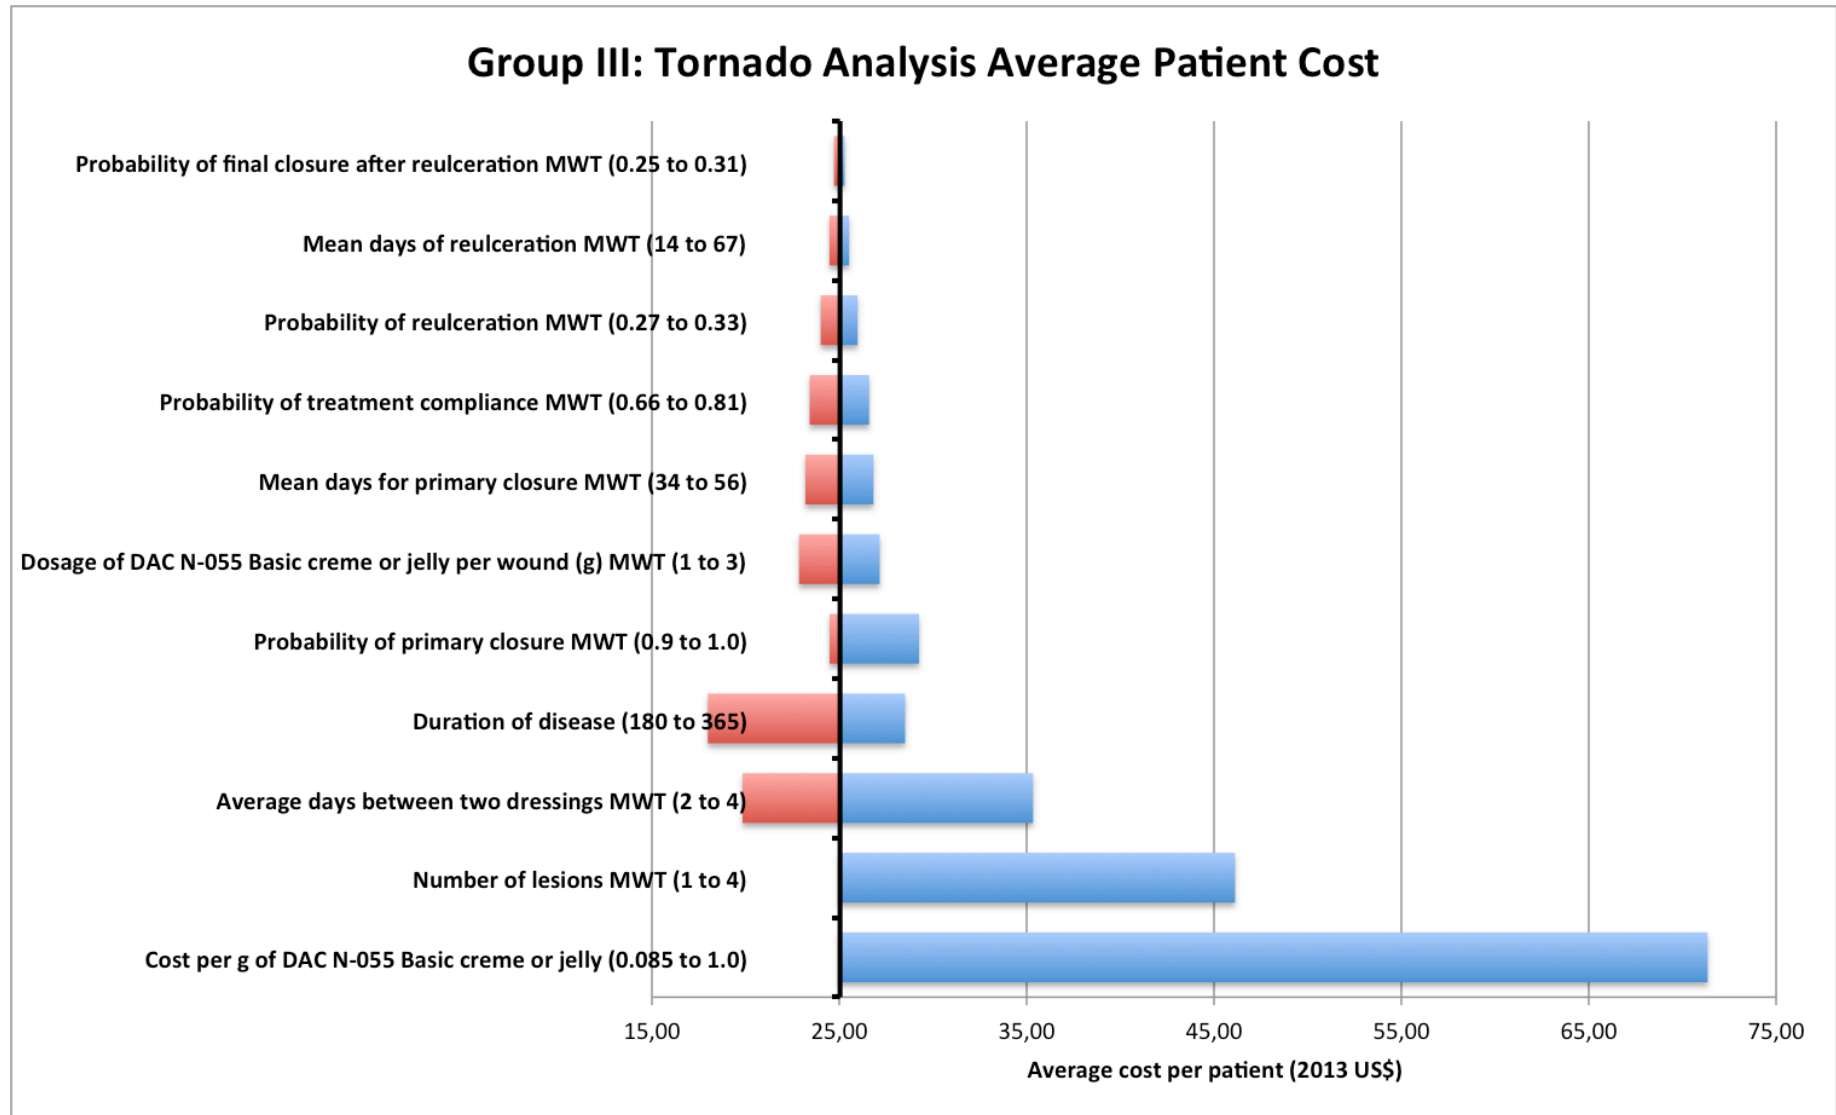

Figure S4

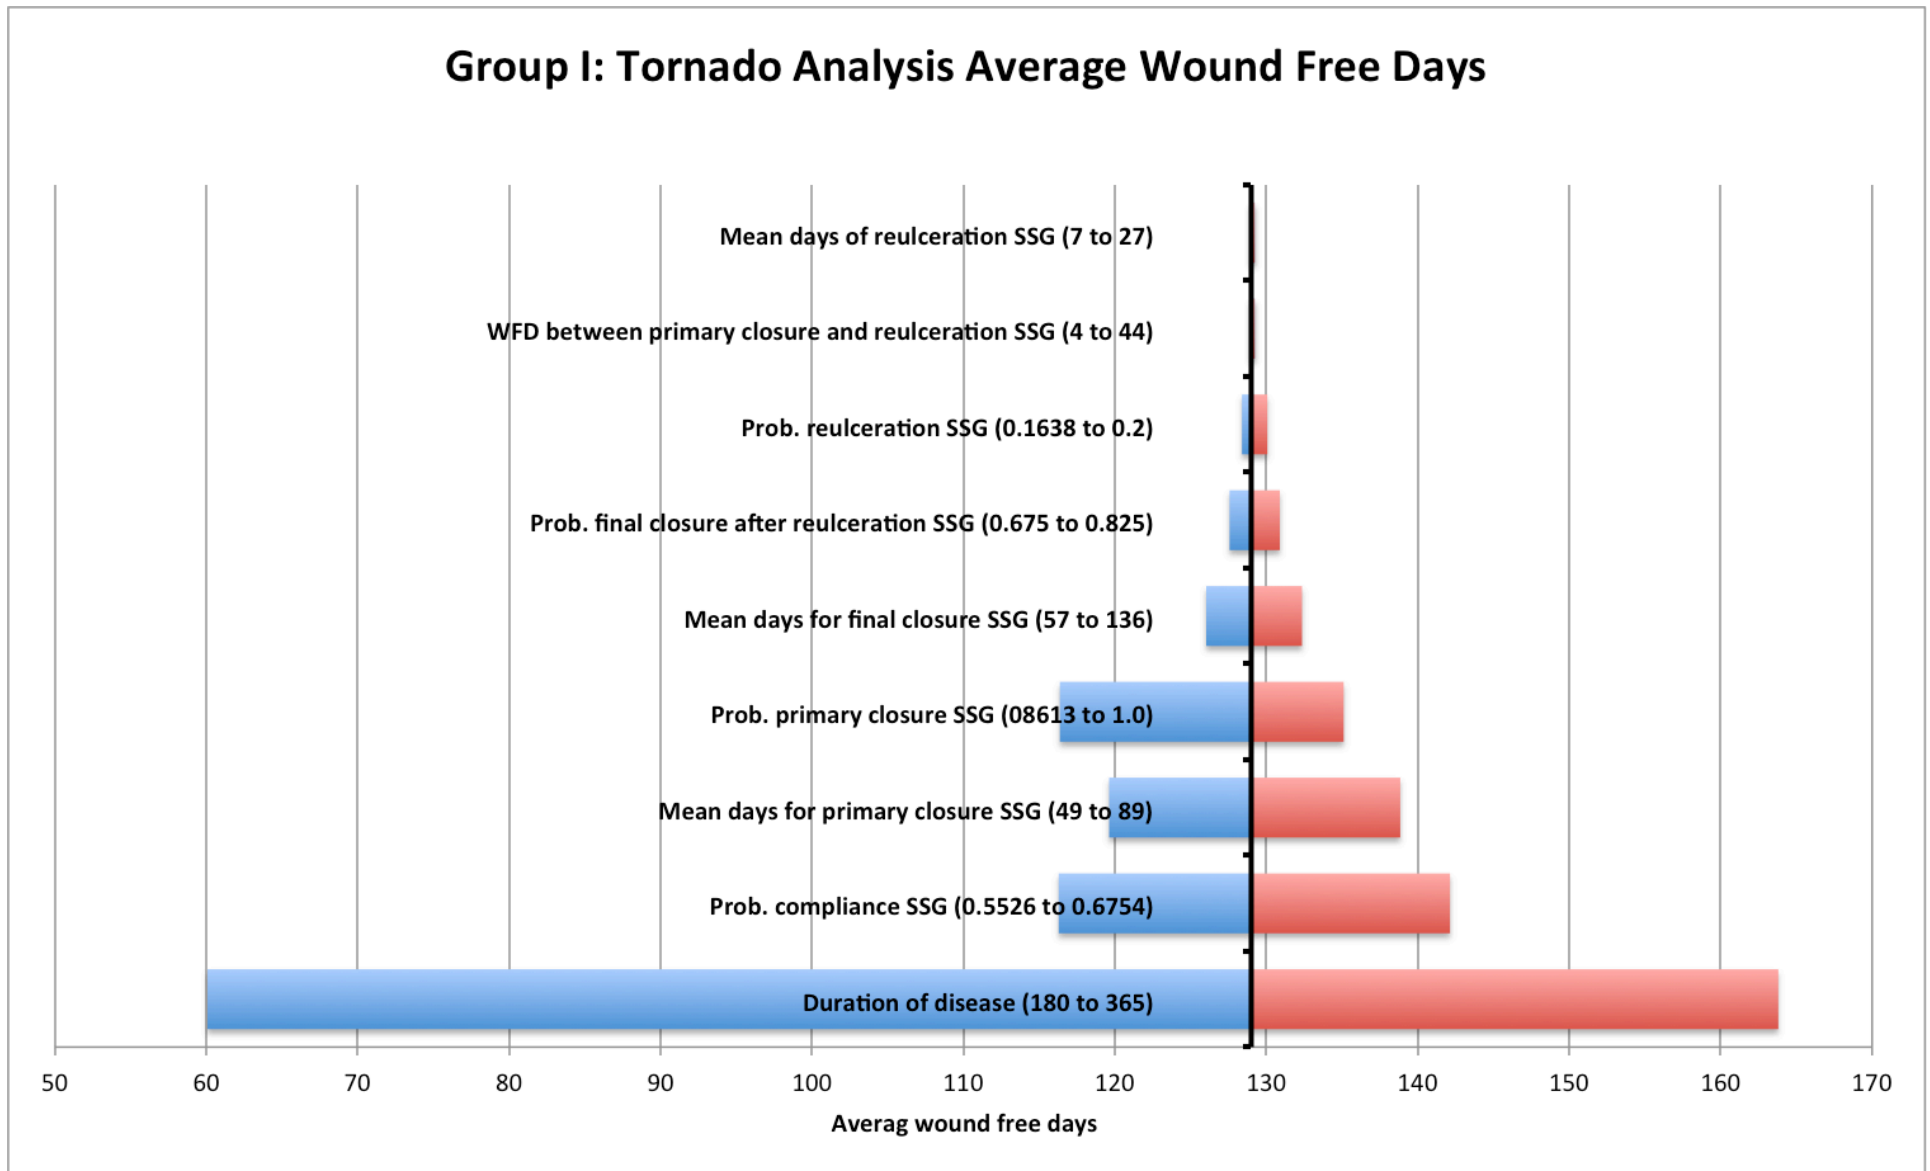

Figure S5

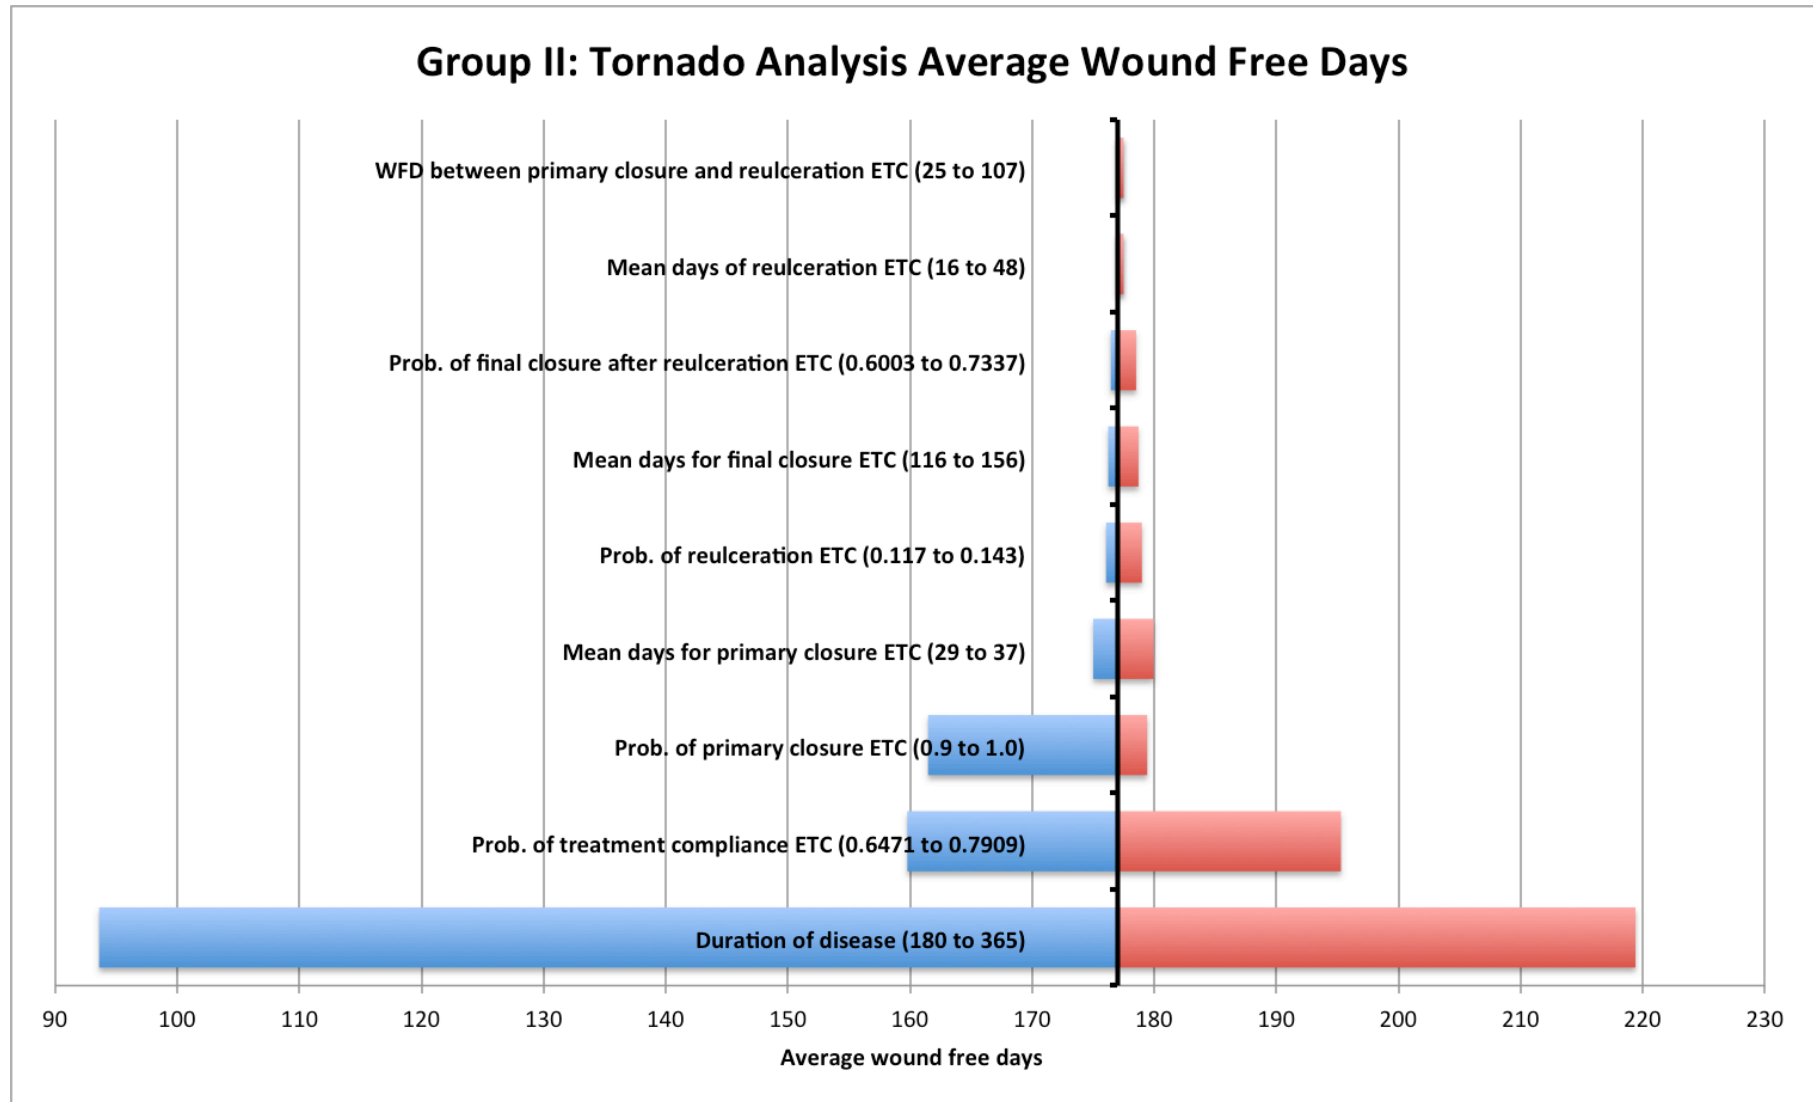

Figure S6

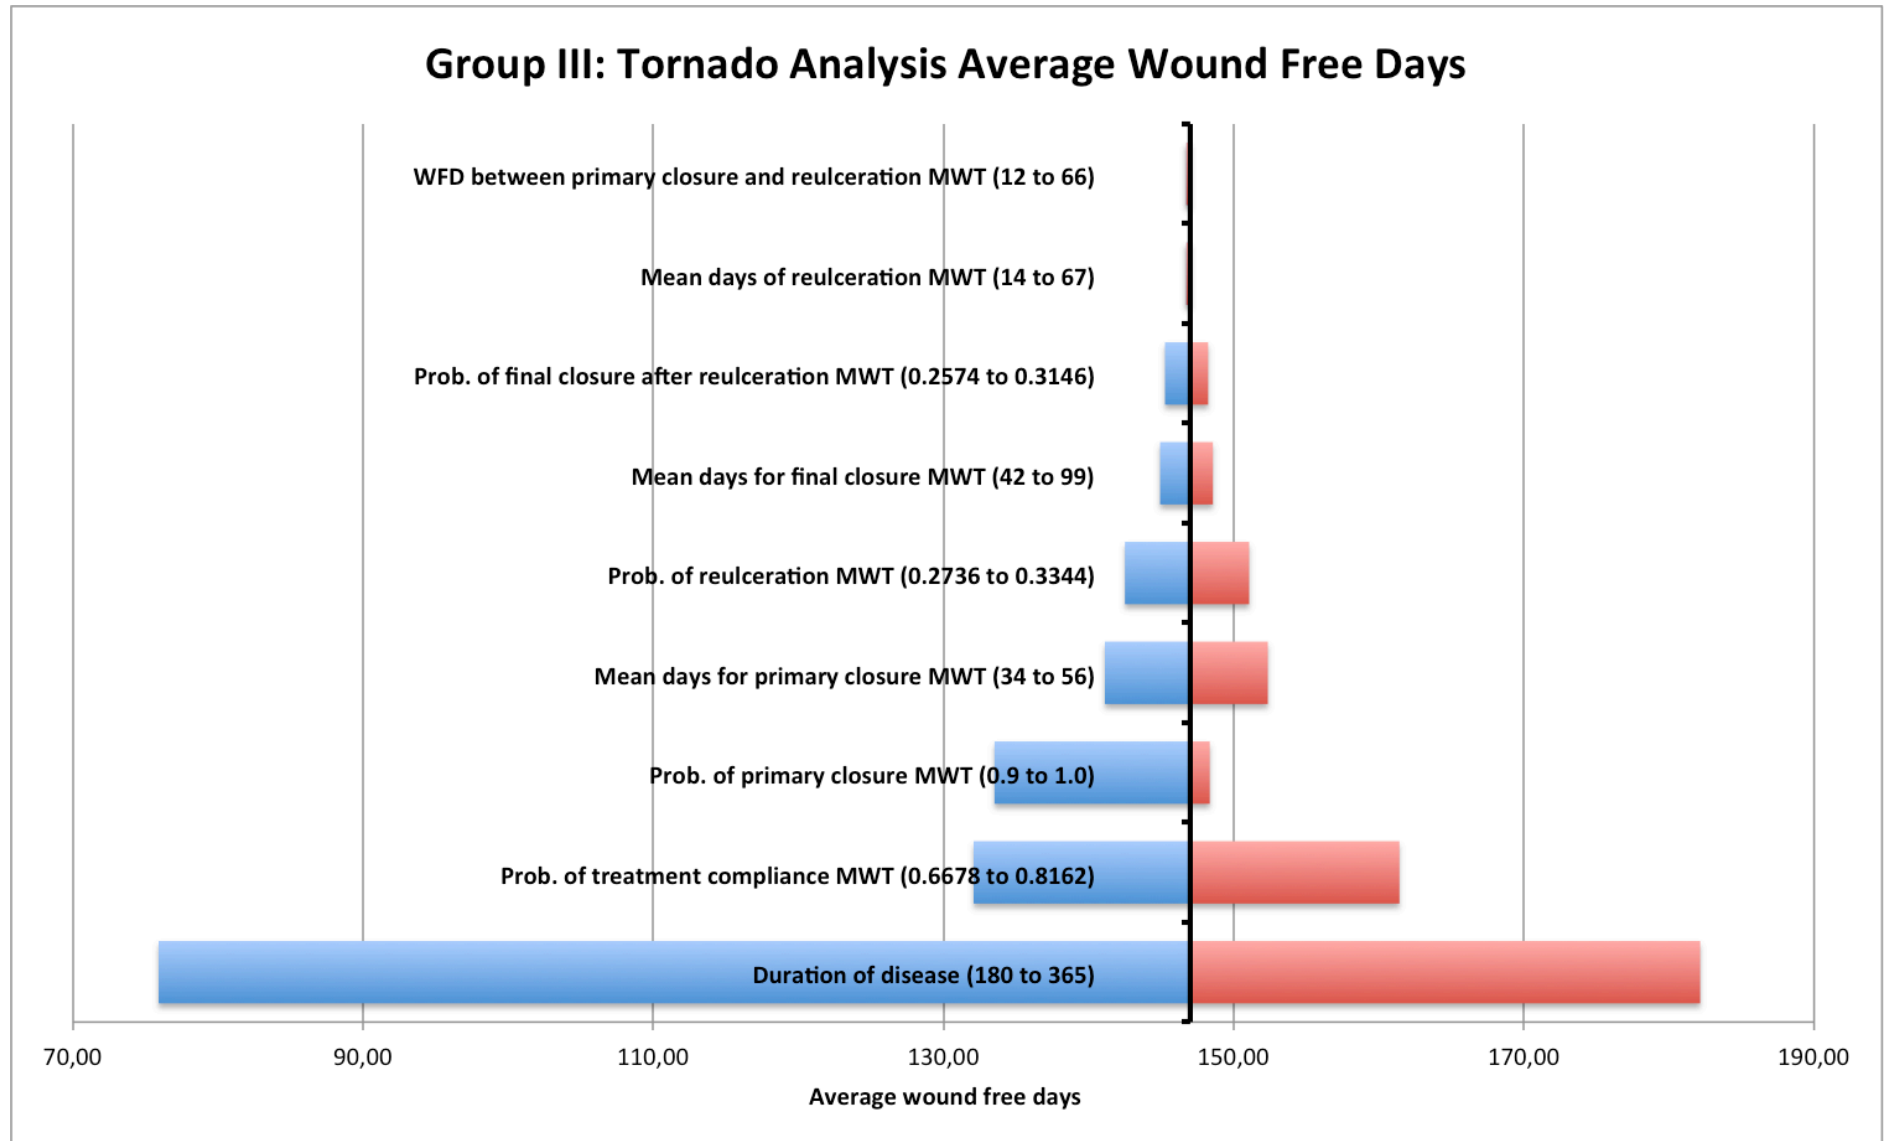

Figure S7

Wound Free Days: Dominant Strategy

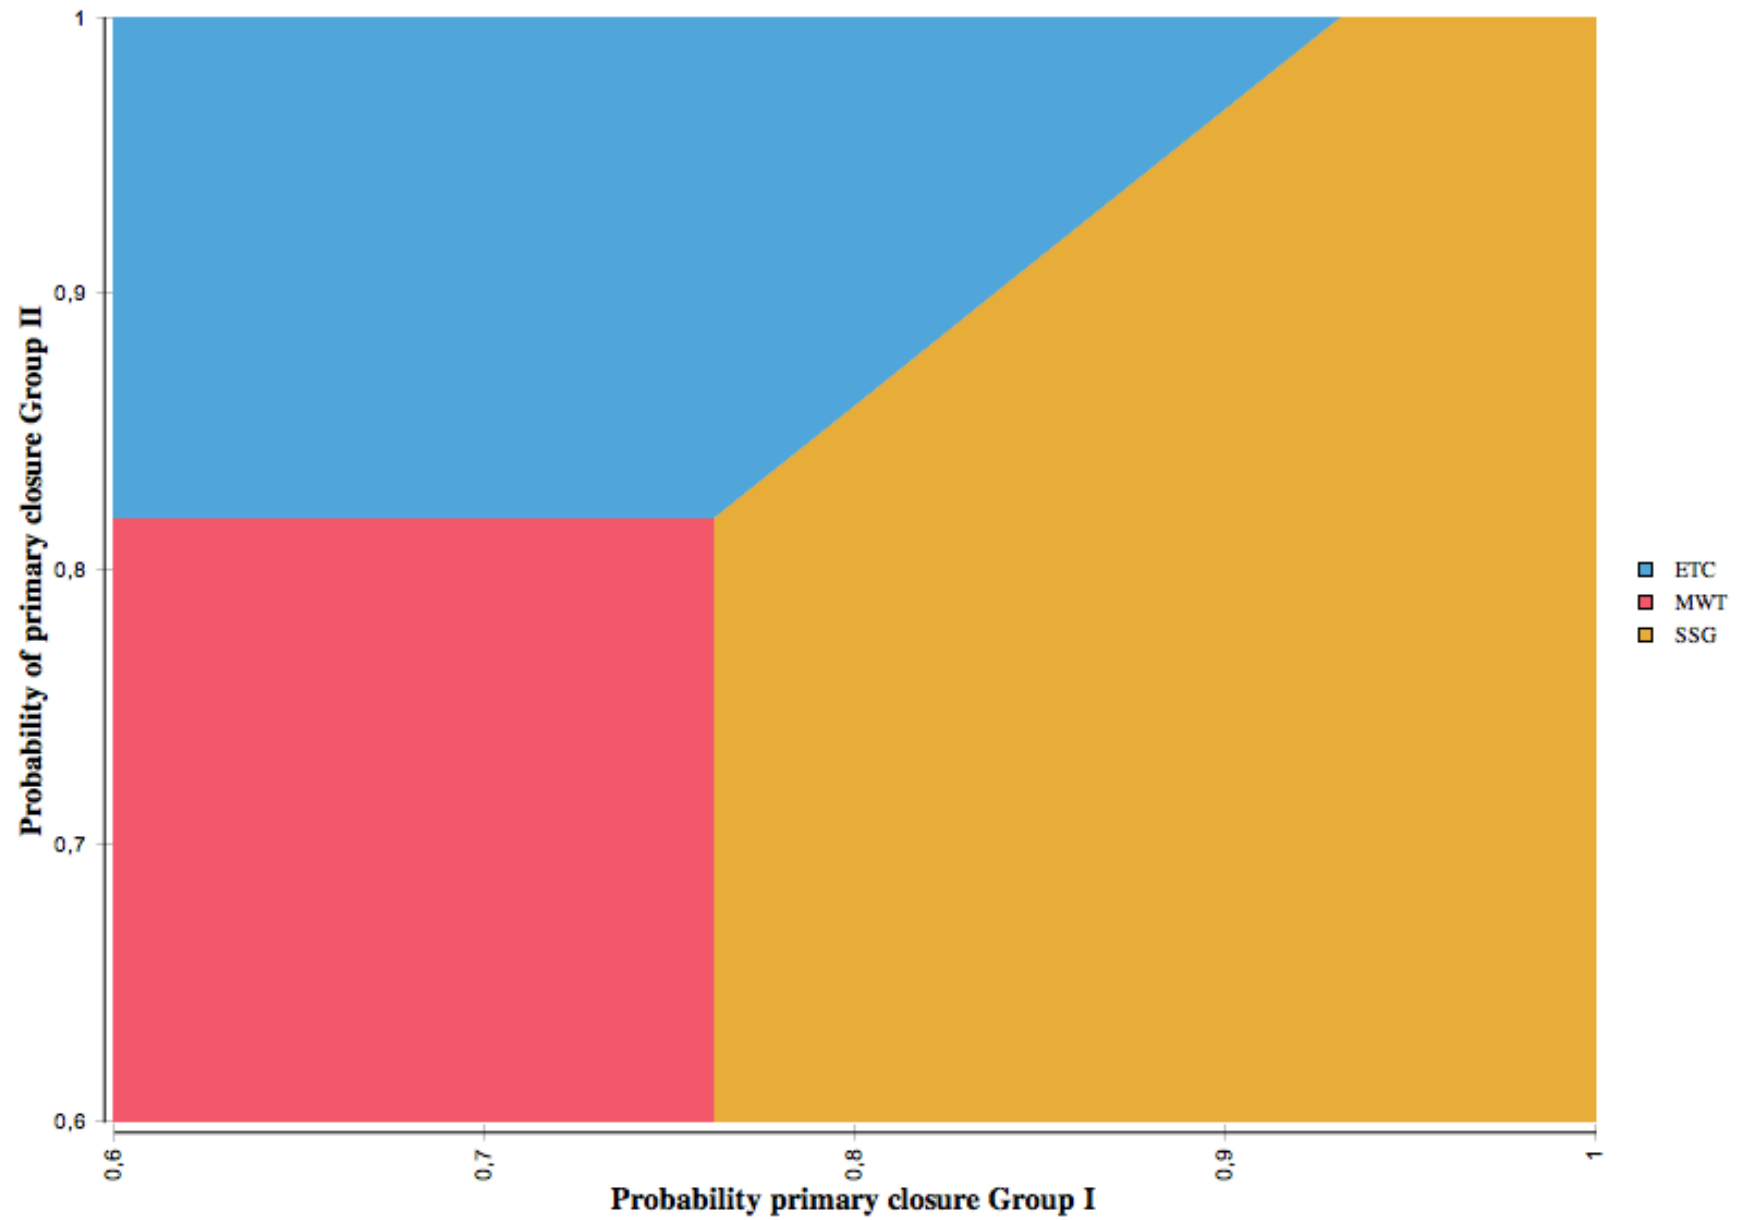

Figure S8

### Wound Free Days: Dominant Strategy

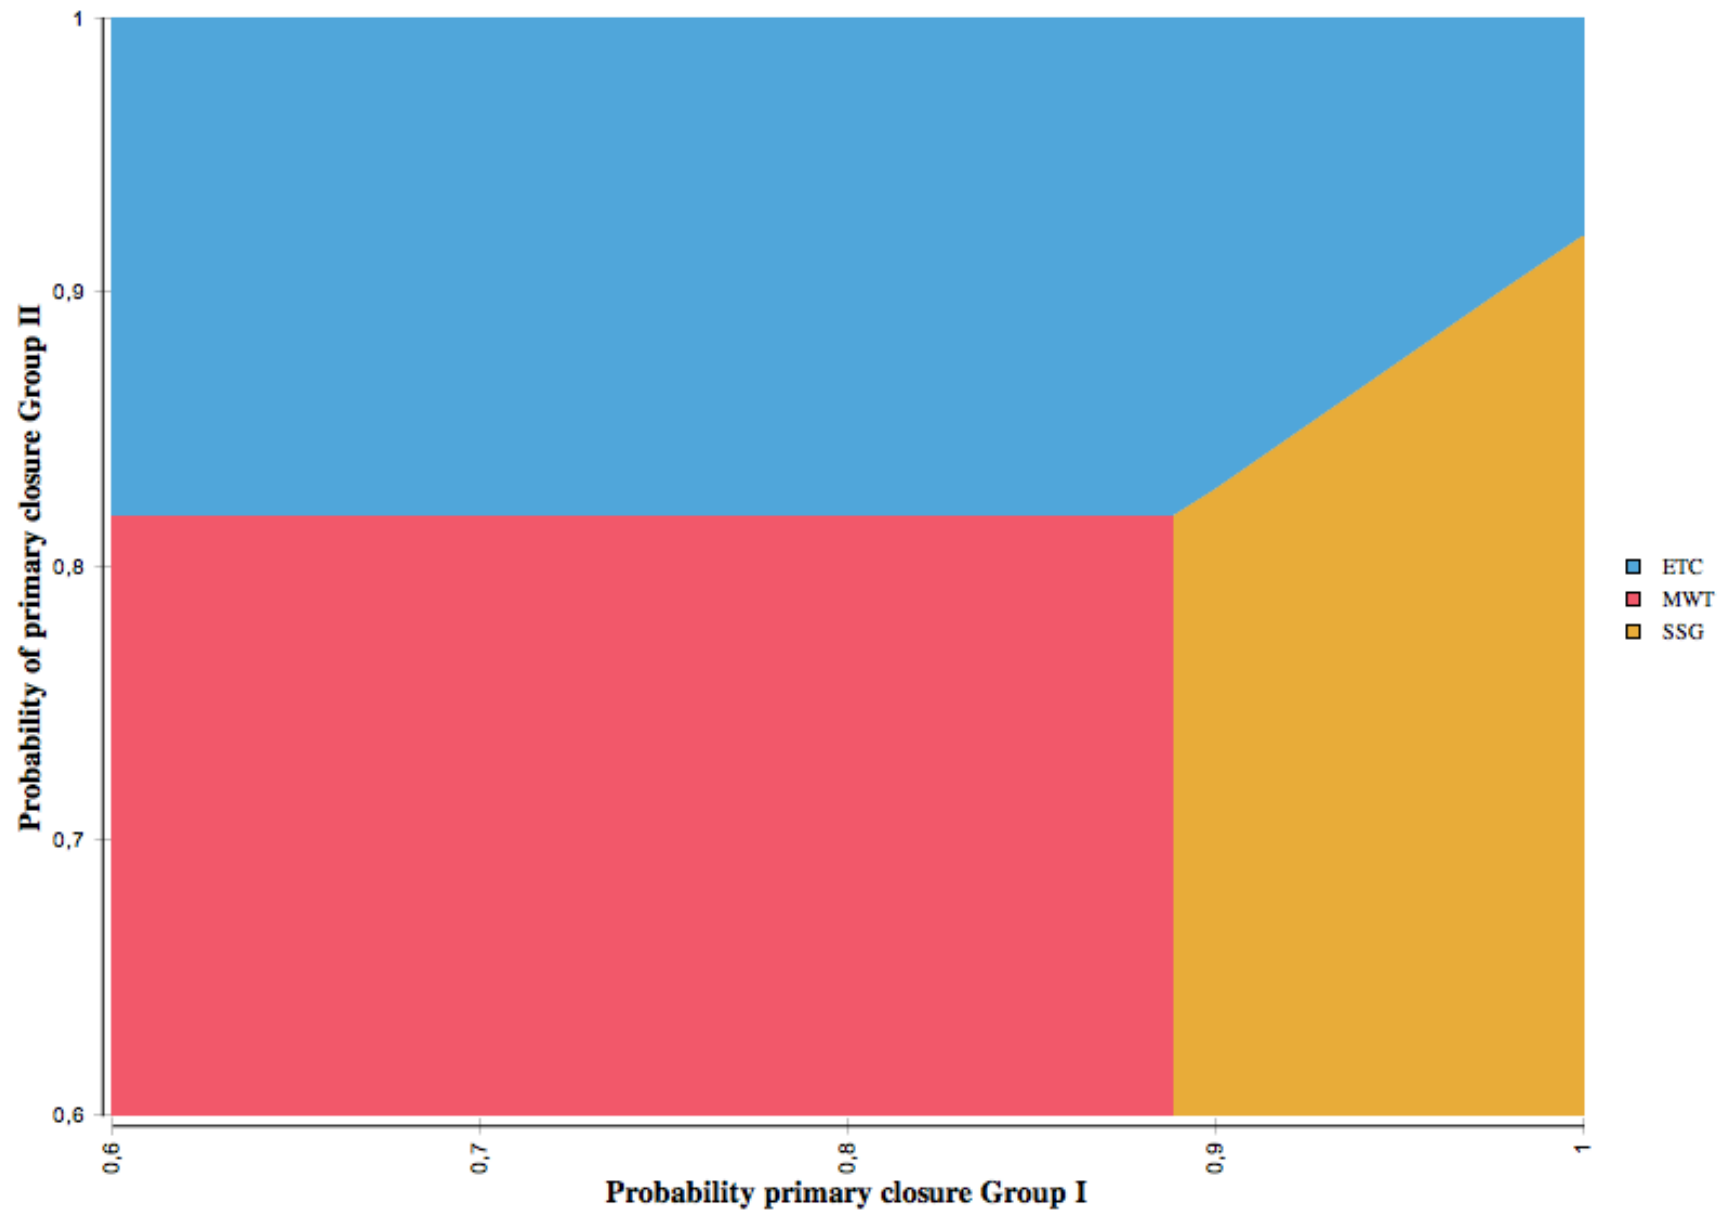



Figure S9

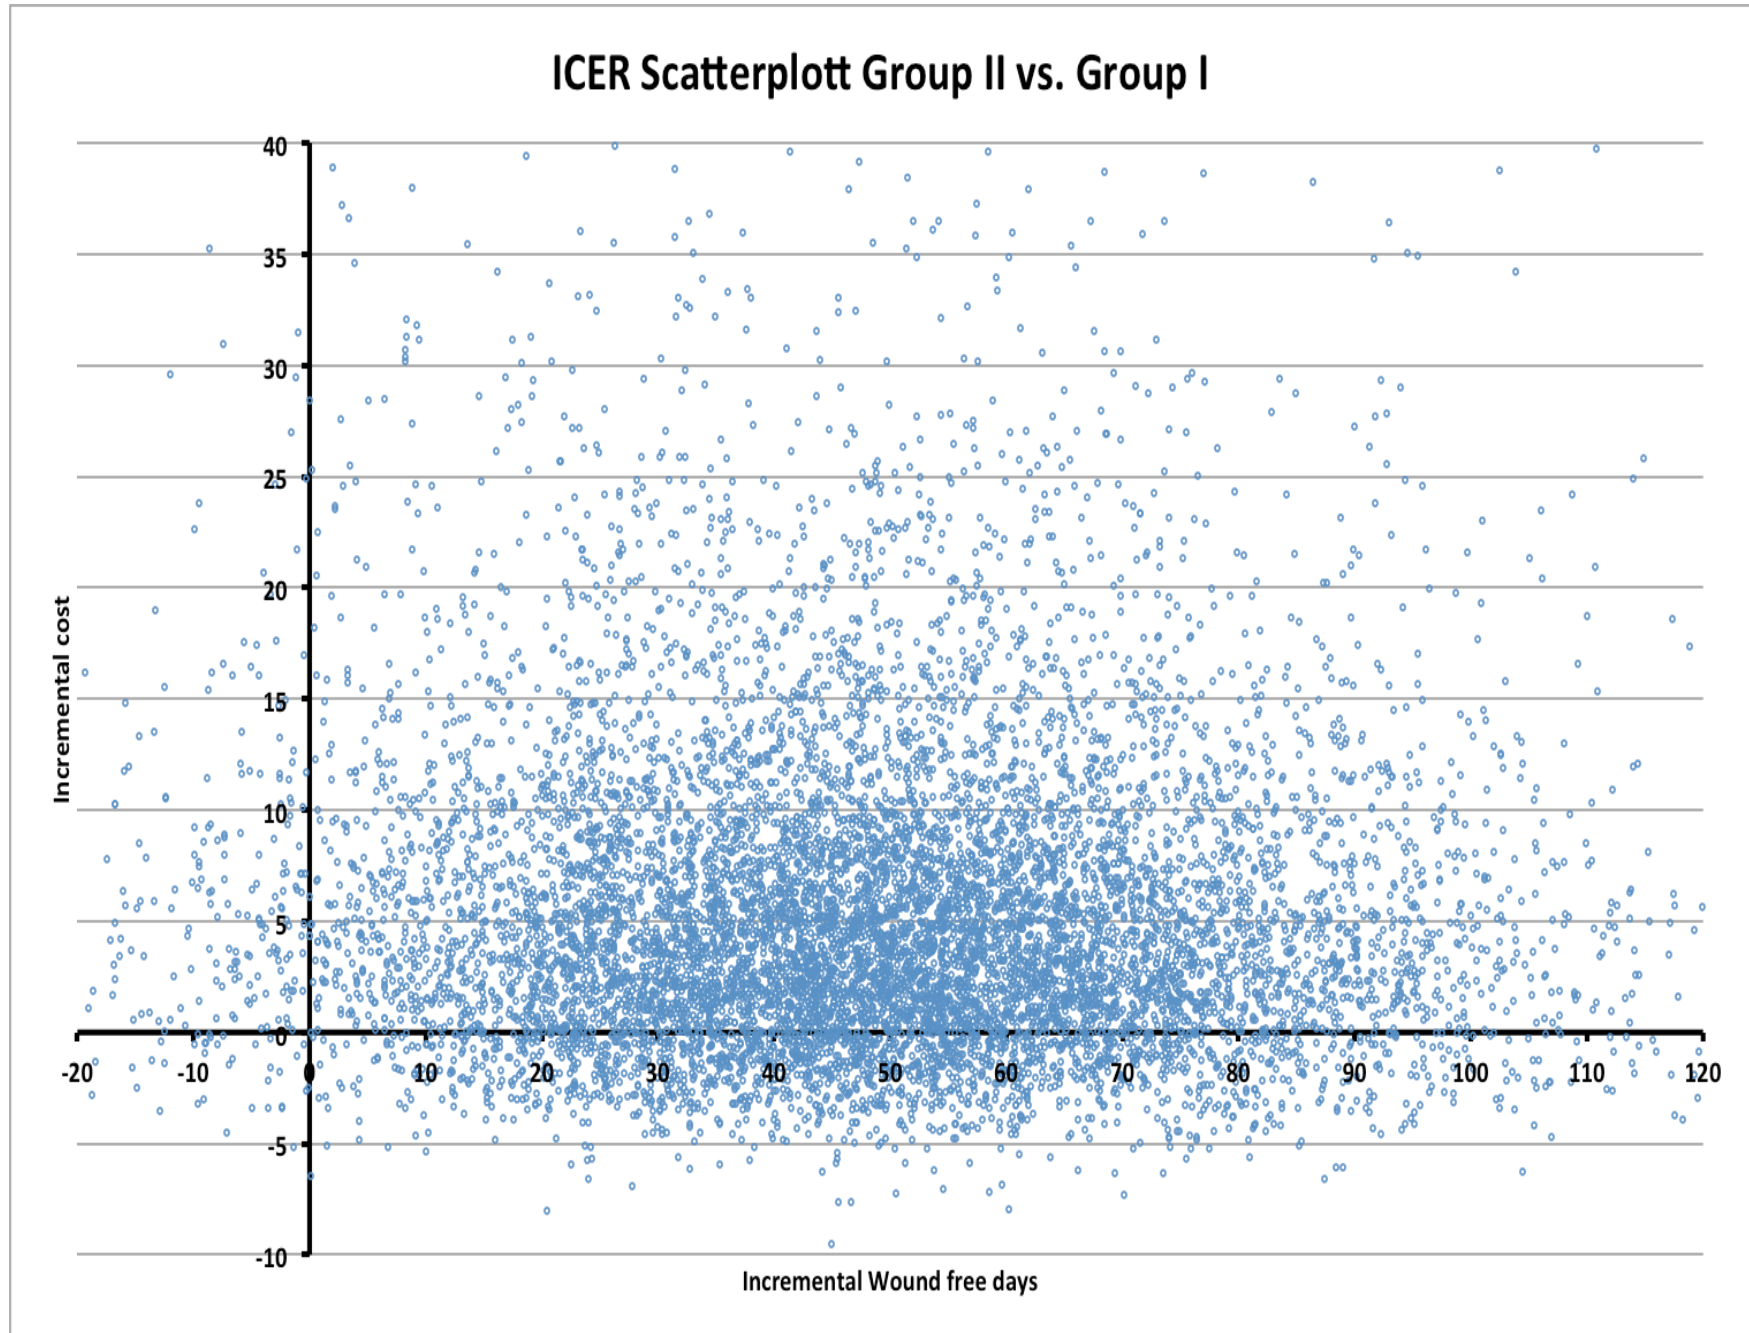

Figure S10

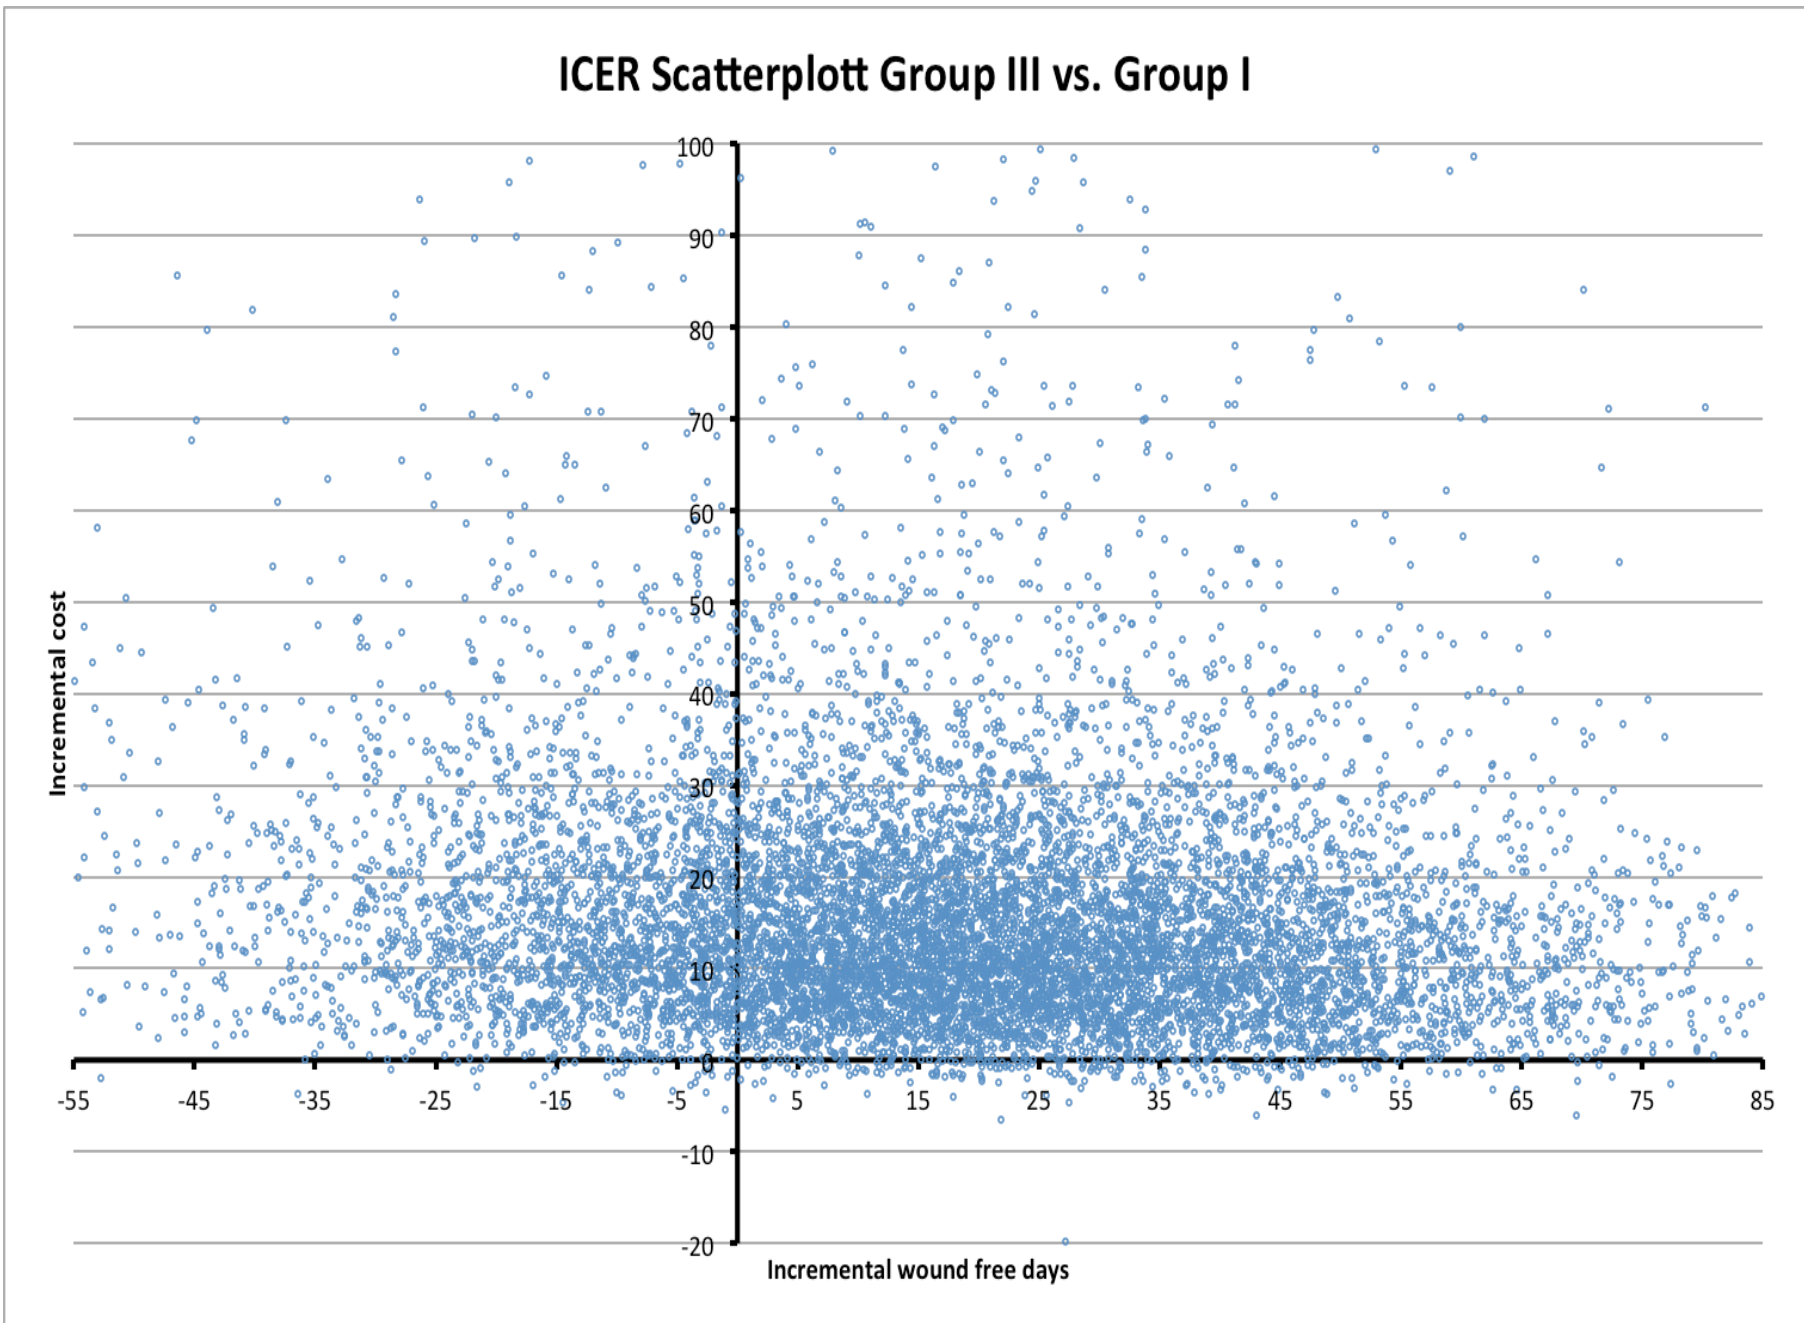

Figure S11

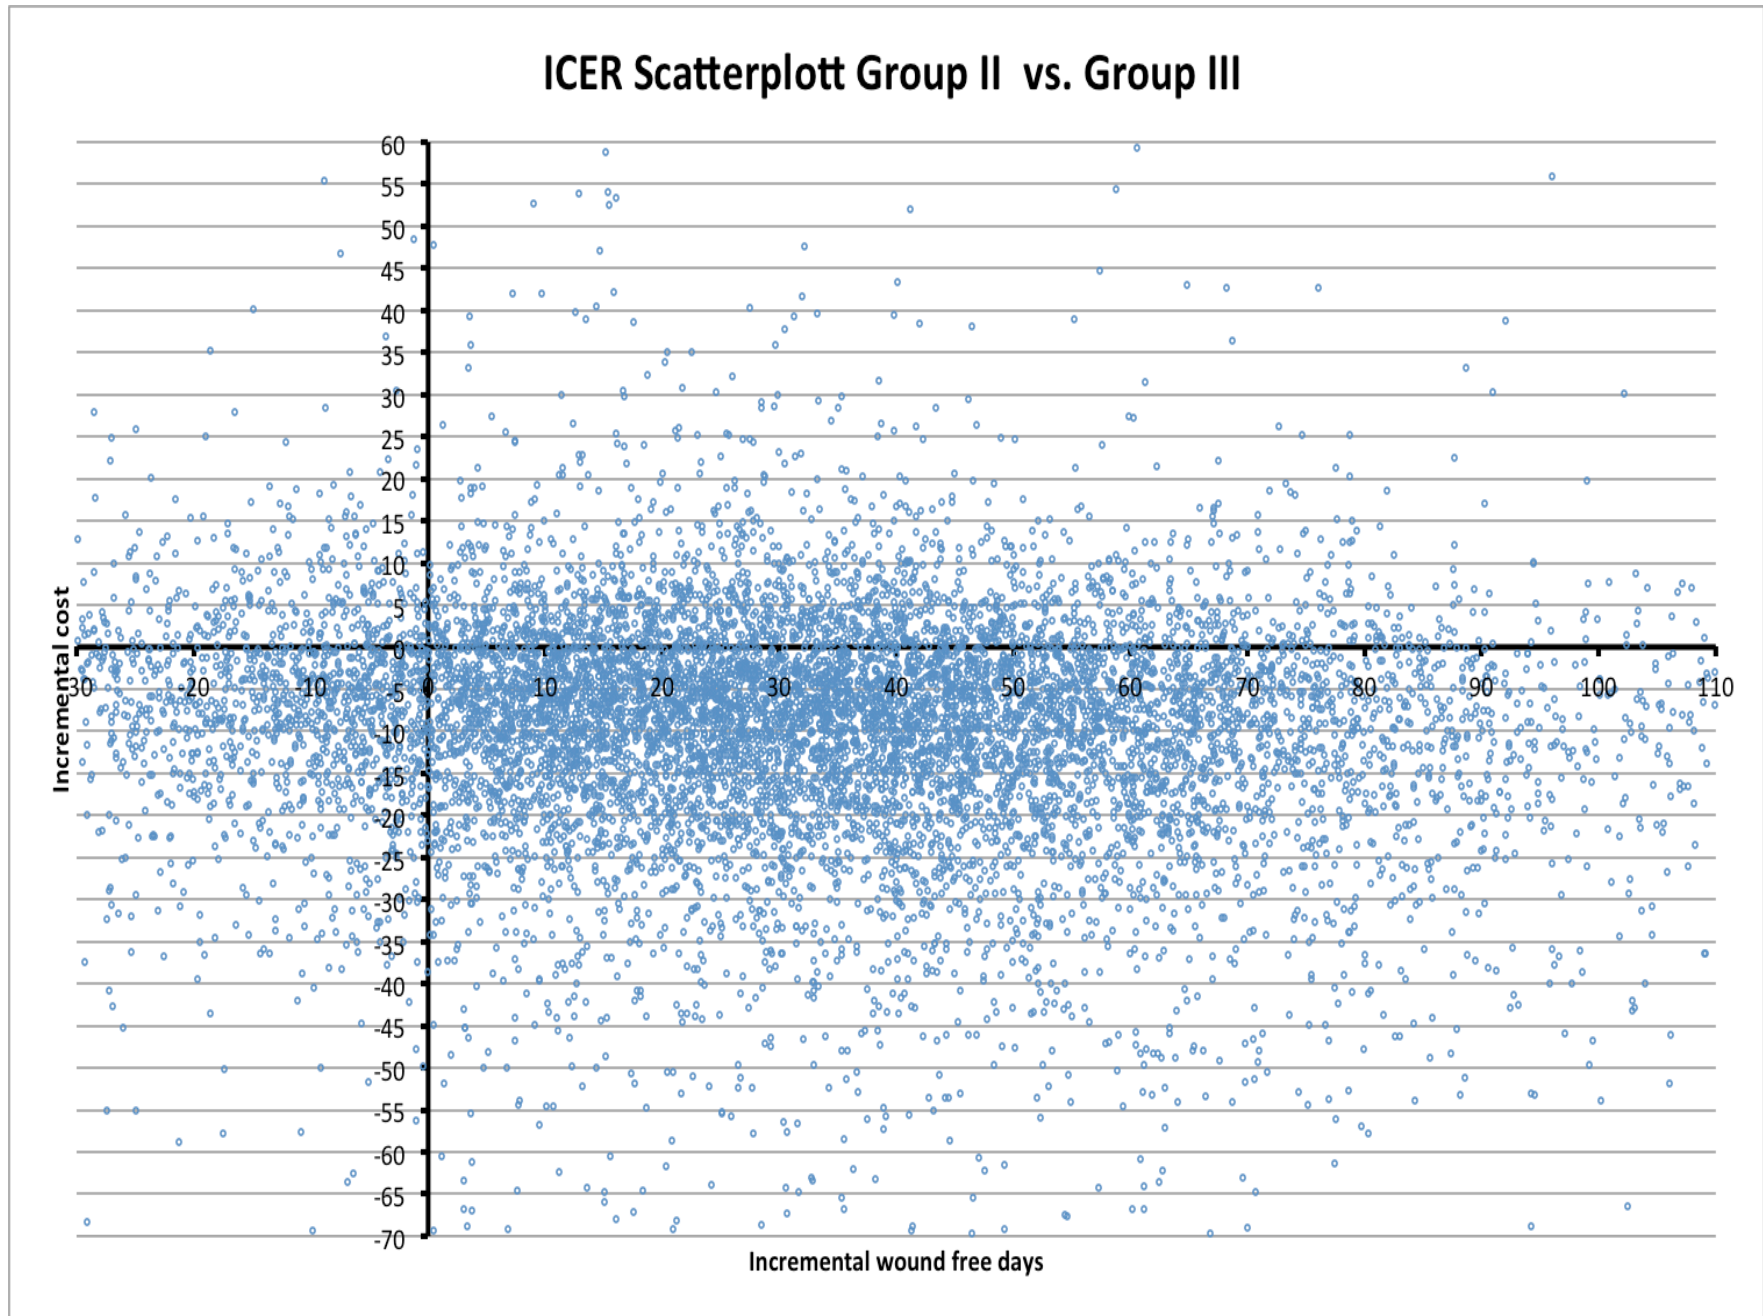

Supplement: 40249_2018_389_MOESM4_ESM.pdf [file 40249_2018_389_MOESM4_ESM.pdf]
